# Supplementary material for: Targeting DDX3 with a small molecule inhibitor for lung cancer therapy
Source: PubMed Central journal article supplement (PMC4492822; doi:10.15252/emmm.201404368), 2015-03-27

# Figure 7

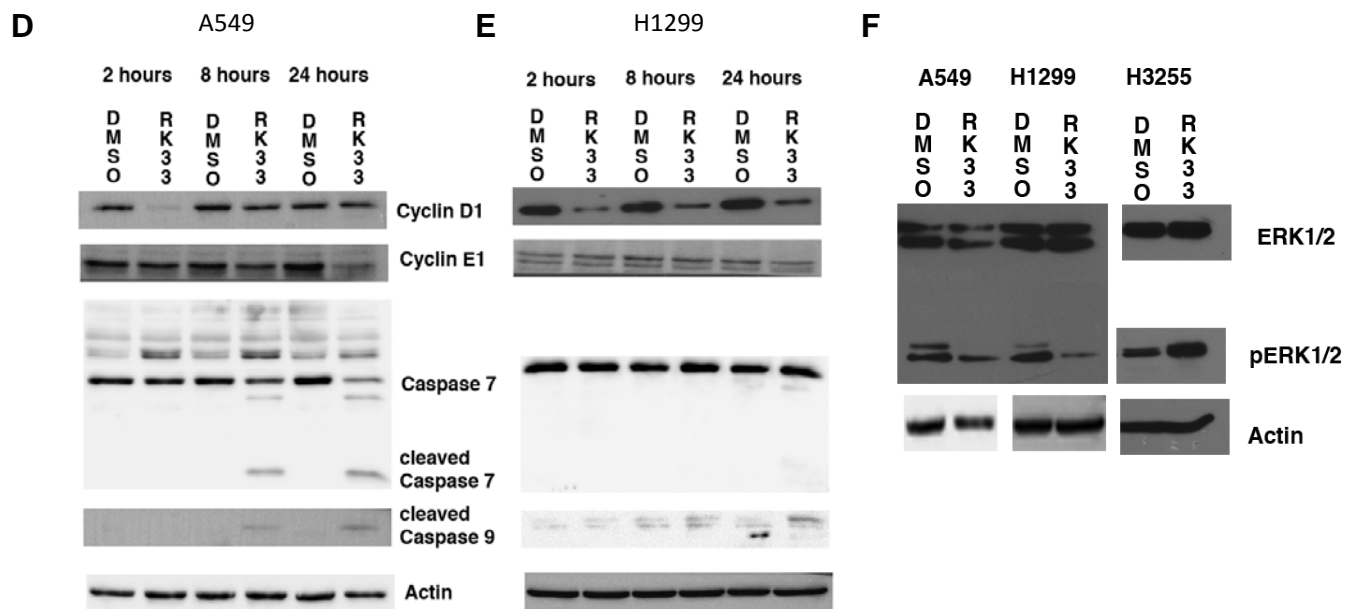

Supplement: emmm0007-0648-sd6.pdf [file emmm0007-0648-sd6.pdf]
