# Supplementary material for: Targeting DDX3 with a small molecule inhibitor for lung cancer therapy
Source: PubMed Central journal article supplement (PMC4492822; doi:10.15252/emmm.201404368), 2015-03-27

**Figure 8**

**B**

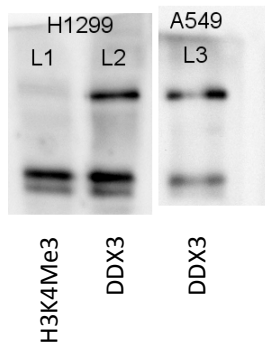

**C**

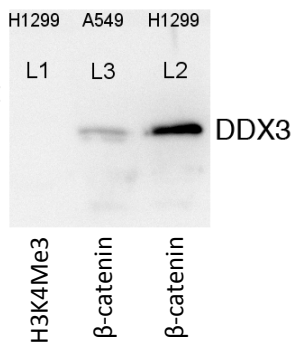

Supplement: emmm0007-0648-sd7.pdf [file emmm0007-0648-sd7.pdf]
